# Supplementary material
Source: publisher figshare collection journal article supplement (https://acs.figshare.com/ndownloader/files/7716178)
Supplement: Supplementary file 1 [file 7716178]

## SUPPORTING INFORMATION

Manuscript Title: Effect of sand bed depth and media age on *Escherichia coli* and turbidity removal in biosand filters

Authors: Julie Napotnik, Derek Baker, and Kristen Jellison

Number of Pages: 7

Figures: S1 – S7

Tables: S1 – S4

Contents include supplementary figures and tables providing additional details on filter construction (dimensions and sand size distribution), influent water quality, and filter performance

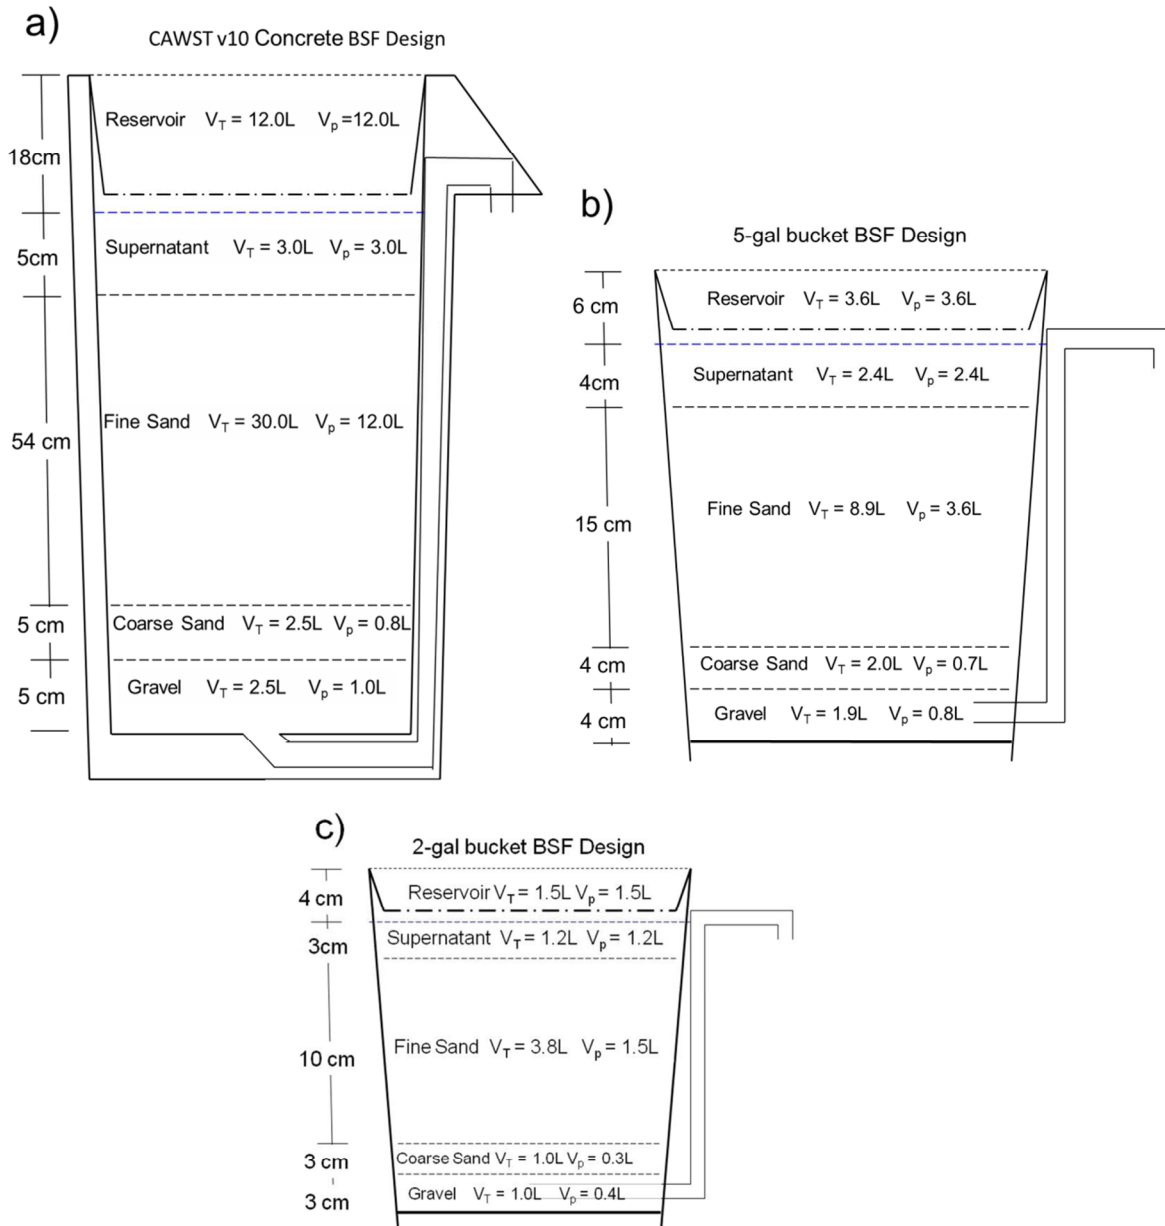

**Figure S1.** Schematics of the filter design for the a) concrete, b) 5-gal bucket, and c) 2-gal bucket casings (not to scale), highlighting the differences in depth, total volume ( $V_T$ ) and pore volume ( $V_p$ ) for the filter regions.

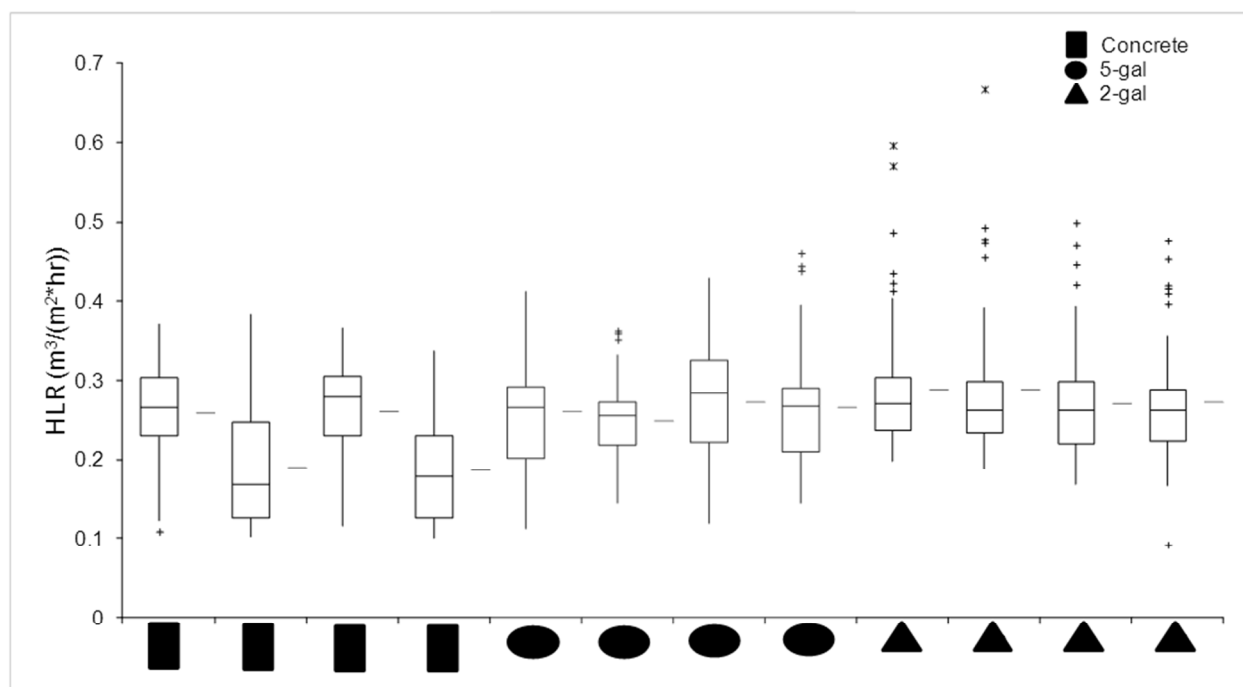

**Figure S2.** Hydraulic loading rates ( $\text{m}^3/\text{m}^2 \cdot \text{hr}$ ) presented as outlier boxplots for each test filter.

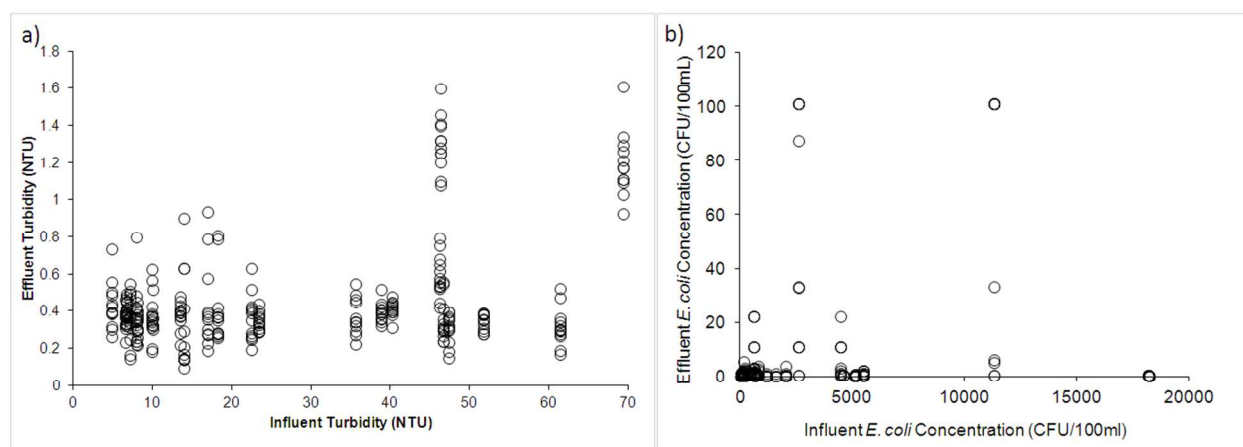

**Figure S3.** Filter effluent as a function of filter influent for a) turbidity (NTU) and b) *E. coli* concentration (CFU/100mL).

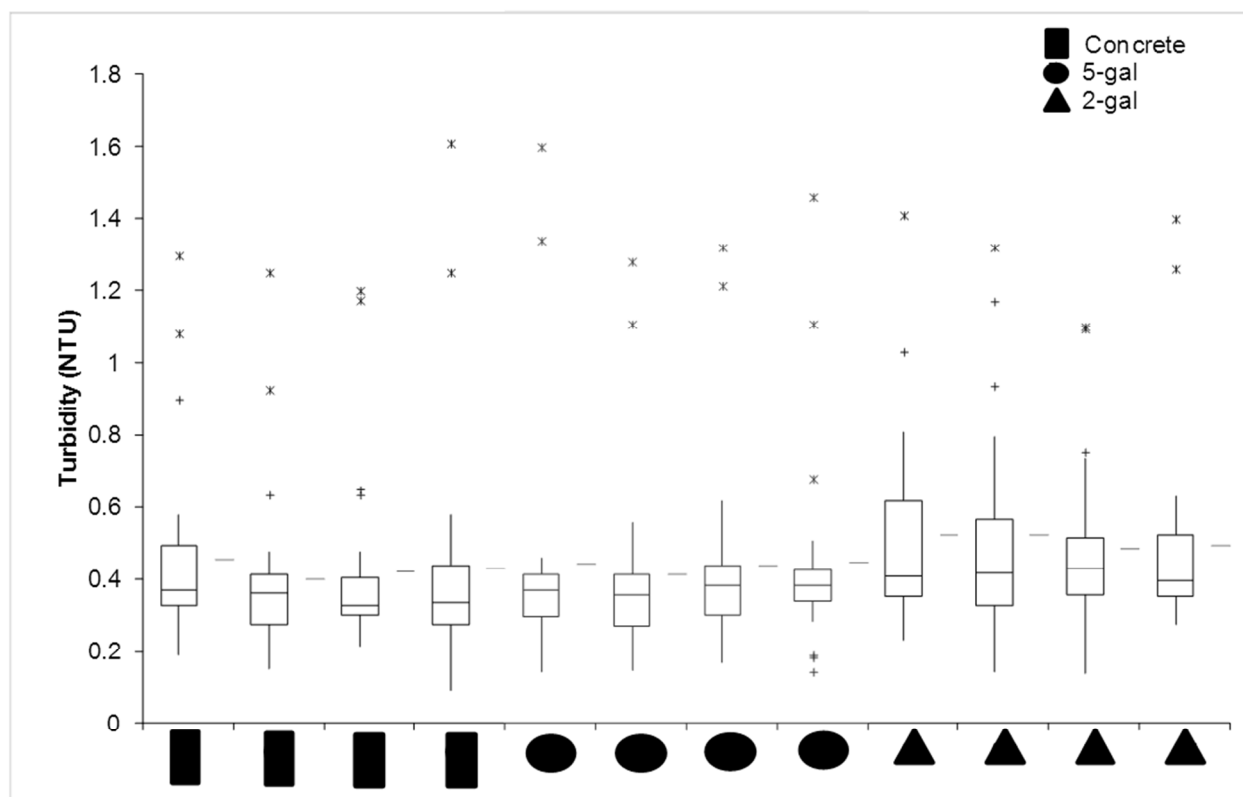

**Figure S4.** Effluent turbidity (NTU) presented as outlier boxplots for each test filter.

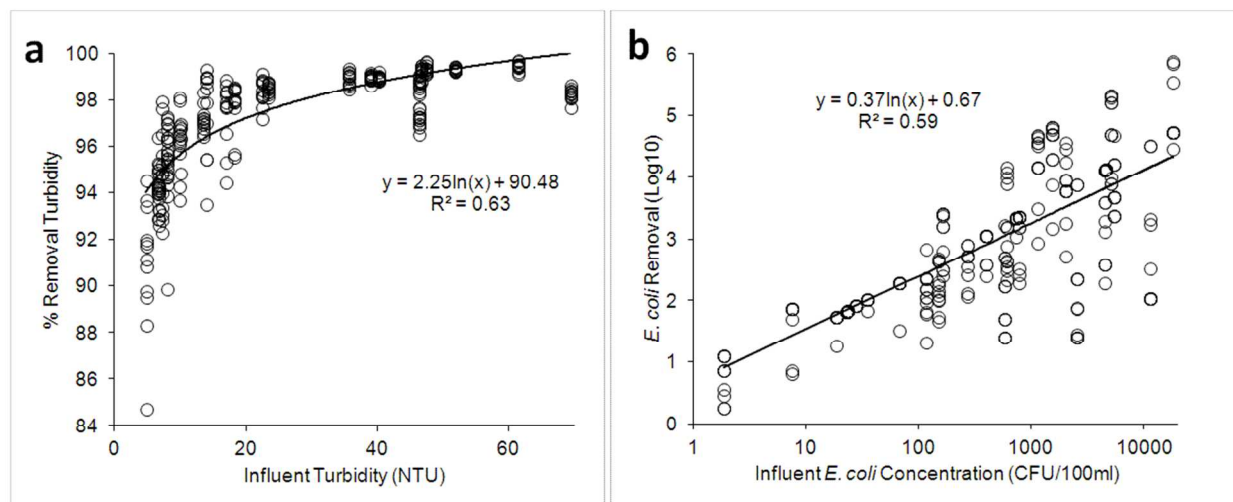

**Figure S5.** Contaminant removal as a function of influent level for a) turbidity (n=280) and b) *E. coli* (n=328), with trendline equations and coefficients of determination ( $R^2$ ).

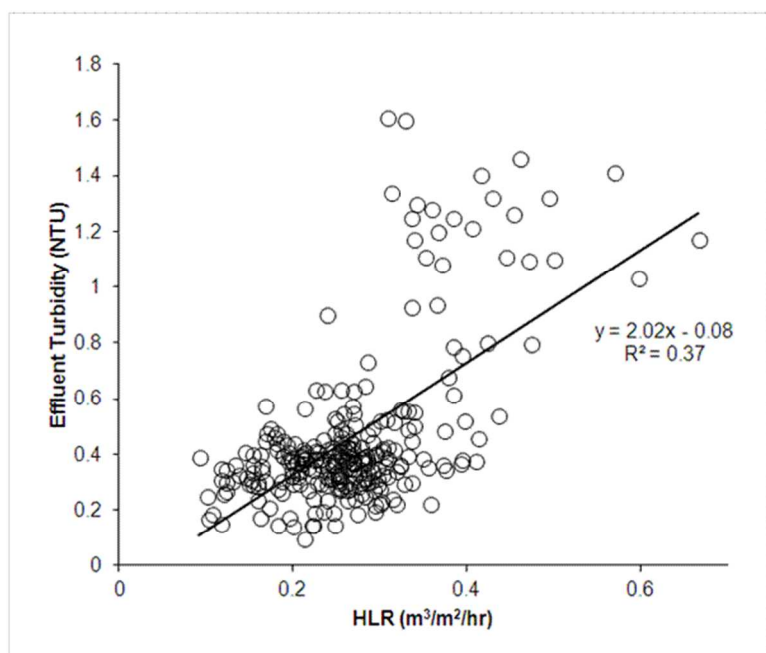

**Figure S6.** Effluent turbidity (NTU) as a function of hydraulic loading rate (HLR) ( $\text{m}^3/\text{m}^2 \cdot \text{hr}$ ) (n=268).

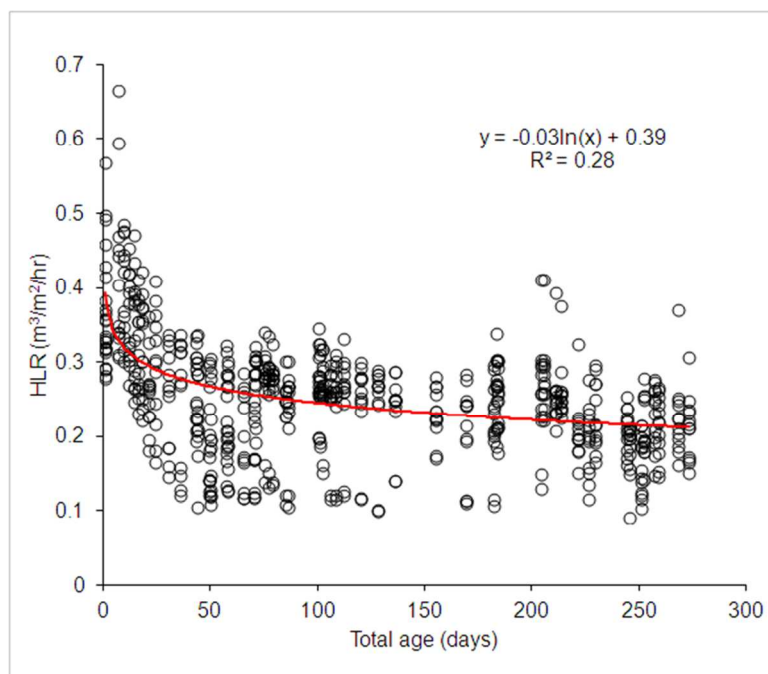

**Figure S7.** Hydraulic loading rate (HLR) ( $\text{m}^3/\text{m}^2 \cdot \text{hr}$ ) as a function of total age of filter (days) (n=659).

**Table S1.** Particle size distribution parameters of the composite sand samples for the four replicate filters of each size.

|               | Concrete |      |      |      | 5-gal bucket |      |      |      | 2-gal bucket |      |      |      |
|---------------|----------|------|------|------|--------------|------|------|------|--------------|------|------|------|
| $d_{10}$ (mm) | 0.18     | 0.18 | 0.18 | 0.17 | 0.18         | 0.18 | 0.18 | 0.19 | 0.16         | 0.17 | 0.16 | 0.17 |
| $d_{60}$ (mm) | 0.33     | 0.30 | 0.42 | 0.32 | 0.32         | 0.33 | 0.32 | 0.43 | 0.29         | 0.34 | 0.31 | 0.30 |
| $U^a$         | 1.83     | 1.67 | 2.33 | 1.88 | 1.78         | 1.83 | 1.78 | 2.26 | 1.81         | 2.00 | 1.94 | 1.76 |

<sup>a</sup>Uniformity coefficient,  $U=d_{60}/d_{10}$

**Table S2.** Summary of influent water quality.

|                                                  | Average $\pm$ Standard Deviation | Range (Min-Max) |
|--------------------------------------------------|----------------------------------|-----------------|
| Total Organic Carbon (mg/L)                      | 12.5 $\pm$ 6.8                   | 5.8 - 24.2      |
| Total Nitrogen (mg/L)                            | 6 $\pm$ 4.8                      | 2 - 14          |
| Phosphorus (mg/L PO <sub>4</sub> <sup>3-</sup> ) | 0.21 $\pm$ 0.15                  | 0.07 - 0.47     |
| pH                                               | 7.5 $\pm$ 0.4                    | 7.1 - 8.8       |
| Alkalinity (mg/L)                                | 41 $\pm$ 9.8                     | 30 - 58         |
| Hardness (mg/L)                                  | 339 $\pm$ 77.3                   | 247 - 492       |

**Table S3.** Median *E. coli* and turbidity removals for each test filter across all test days with p-values for comparison of 1) replicate filters of the same size and 2) all twelve filters.

| <i>E. coli</i> Removal (log10)<br>Replicate Filters |     |     |     |     |         | % Turbidity Removal<br>Replicate Filters |      |      |      |         |  |
|-----------------------------------------------------|-----|-----|-----|-----|---------|------------------------------------------|------|------|------|---------|--|
| Filter Size                                         | 1   | 2   | 3   | 4   | p-value | 1                                        | 2    | 3    | 4    | p-value |  |
| Concrete                                            | 4.0 | 3.8 | 4.0 | 3.9 | 0.9745  | 98.1                                     | 98.4 | 98.3 | 98.2 | 0.9651  |  |
| 5-gal                                               | 3.8 | 3.8 | 3.8 | 3.7 | 0.9620  | 98.2                                     | 98.4 | 98.4 | 98.4 | 0.9869  |  |
| 2-gal                                               | 3.7 | 3.8 | 3.8 | 3.9 | 0.9082  | 97.4                                     | 98.2 | 98.4 | 97.9 | 0.9943  |  |
| <b>All 12 filters</b>                               |     |     |     |     | 0.9758  |                                          |      |      |      | 0.9927  |  |

**Table S4.** Number of microbial challenge experiments performed for various schmutzdecke age groups.

| Days since last cleaning | Schmutzdecke Age     |                        |                         |                       |
|--------------------------|----------------------|------------------------|-------------------------|-----------------------|
|                          | 1 Week<br>(1-8 days) | 2 Weeks<br>(9-19 days) | 3 Weeks<br>(20-32 days) | 4 Weeks<br>(>32 days) |
| <b>Concrete</b>          | 11                   | 5                      | 7                       | 5                     |
| <b>5-gal</b>             | 7                    | 6                      | 6                       | 8                     |
| <b>2-gal</b>             | 7                    | 6                      | 6                       | 8                     |
